# Supplementary material
Source: PubMed Central journal article supplement (PMC3060656)
Supplement: NIHMS270007-supplement-Suppl_Figures.pdf [file NIHMS270007-supplement-Suppl_Figures.pdf]

**a**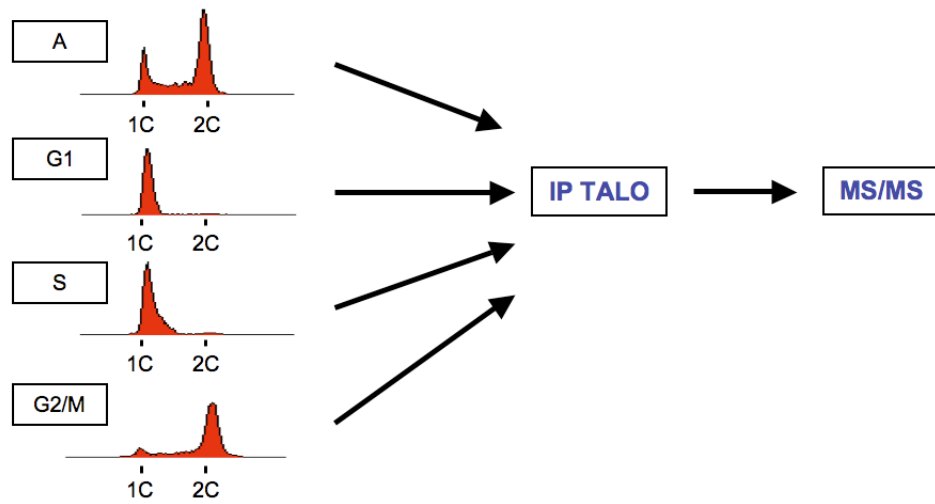**b**

H2A (85%)  
 SGGKGGKAGS AAKASQSRSA KAGLTFPVG RV HRLLRRGNY AQRIGSGAPV  
 YLTAVLEYLA AEILELAGNA A R DNKKTRII PRHLQLAIRN DDELNKLGN  
 VTIAQGGVLP NIHQNLLPKK SAKATKASQEL

H2B (94%)  
 SAKAEKKPAS KAPAEKKPAA KKTSTSTDGK K RSKARKETY SSIYIKVLKQ  
 THPDTGISQK SMSILNSFVN DIFERLATEA SKLAAYNKKS TISA REIQTA  
 VRLLPGELA KHAVSEGT RA VTKYSSSTQ A

H3 (86%)  
 ARTKQTARKS TGGKAPRKQLASKAA RKSAP STGGVKKPHR YKPGTVAL RE  
 IRRFQKSTEL LIRKLPFQRL VREIAQDFKT DLRFOSSAIG ALQESVEAYL  
 VSLFEDTNLA AIHAKRVTIQ KDKIKLARRL RGERS

H4 (84%)  
 SGRGKGGKGL GKGGAKHRK ILRDNIQGIT KPAIRRLARR GGVKRISGLI  
 YEEVRAVLKS FLESVIRDV TYTEHAKRKT VTSLDVVYAL KRQGRTLYGF GG

**c**

|     |      | TALO |    |   |      | Bulk |    |   |      |
|-----|------|------|----|---|------|------|----|---|------|
|     |      | A    | G1 | S | G2/M | A    | G1 | S | G2/M |
| H2A | S1   | -    | -  | ▲ | ▲    | -    | -  | - | -    |
|     | S15  | -    | -  | - | ▲    | -    | -  | - | -    |
| H2B | K111 | -    | -  | - | -    | ■    | -  | ■ | ■    |
|     | K123 | ◆    | -  | - | ◆    | ◆    | -  | ◆ | ◆    |
| H3  | K9   | ●    | ●  | ● | ●    | ●    | ●  | ● | ●    |
|     | K14  | ●    | ●  | ● | ●    | ●    | ●  | ● | ●    |
|     | K18  | ●    | ●  | ● | ●    | ●    | ●  | ● | ●    |
|     | K23  | ●    | ●  | ● | ●    | ●    | ●  | ● | ●    |
|     | K27  | ●    | ●  | ● | ●    | ●    | ●  | ● | ●    |
|     | K36  | ■    | ■  | ■ | ■    | ■    | ■  | ■ | ■    |
|     | K37  | ■    | ■  | - | ■    | -    | -  | - | -    |
|     | K56  | ●    | ●  | ● | ●    | ●    | ●  | ● | ●    |
|     | K79  | ■    | ■  | ■ | ■    | ■    | ■  | ■ | ■    |
| H4  | K5   | ●    | ●  | ● | ●    | ●    | ●  | ● | ●    |
|     | K8   | ●    | ●  | ● | ●    | ●    | ●  | ● | ●    |
|     | K12  | ●    | ●  | ● | ●    | ●    | ●  | ● | ●    |
|     | K16  | ●    | ●  | ● | ●    | ●    | ●  | ● | ●    |
|     | K31  | ■    | ■  | ■ | -    | ■    | ■  | ■ | -    |
|     | K79  | ●    | -  | ● | ●    | -    | -  | - | -    |

**Methylation States**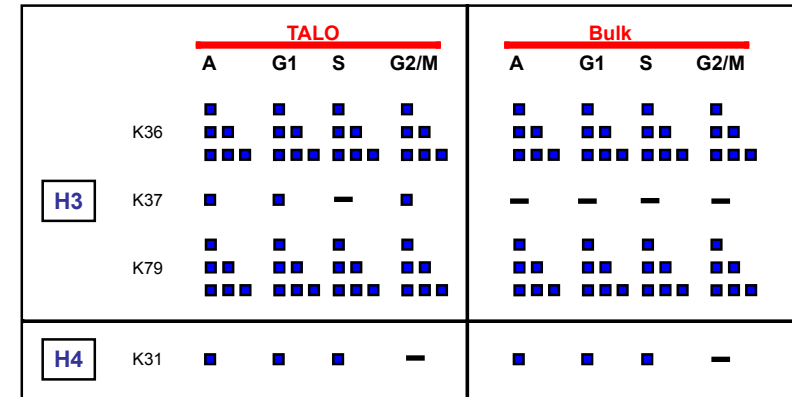

- Acetylation
- Methylation
- ◆ Ubiquitination
- ▲ Phosphorylation
- No modification observed

**Supplementary Figure 1. Qualitative detection of histone modifications over the cell cycle by mass spectrometry.** (a) FACS profiles of TALO8-containing cells at harvest time points, growing asynchronously (A), in G1- phase, S-phase (17 minutes after release from G1) or G2/M-phase. DNA content is noted in red. As a control, isogenic cells lacking TALO-8 were also harvested from each of the stages and bulk, chromatin-bound histones were prepared and analyzed by mass spectrometry. (b) Peptides from the four core histones detected by mass spectrometry. Proteins were digested with ArgC, which cleaves at the carboxy-terminal of arginine residues (highlighted in blue). All the peptides detected by MS are shown in red while peptides that were not detected are in black. The coverage for each histone is indicated within parantheses. (c) The histone modifications detected by MS. The left half depicts histone modifications found on histones purified from TALO8, while the right half shows histone modifications found on bulk histones. In each half, each vertical column indicates all the histone modifications found in a particular cell cycle stage. Modified residues that were previously unreported in yeast are shown in purple. Lysine residues can be mono-, di- and tri-methylated and the inset box depicts all the methylation states that were detected.

**a**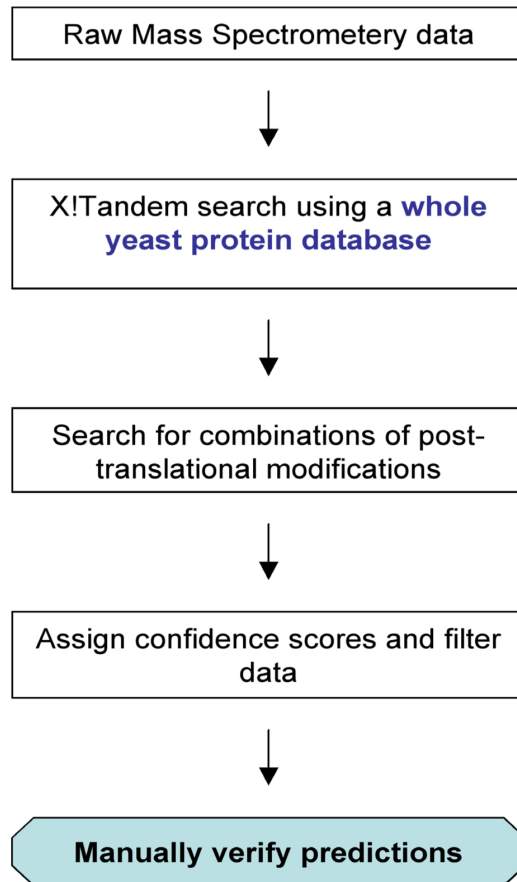**b**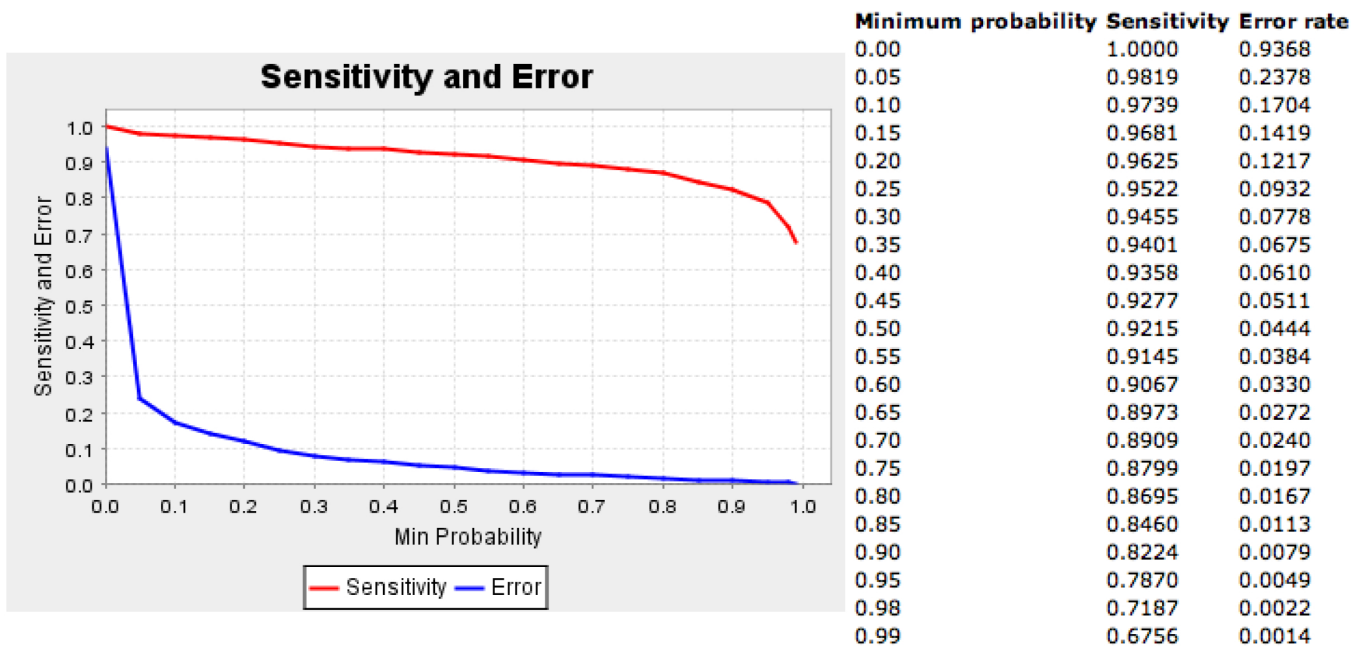

**Supplementary Figure 2. Analysis of the MS data.** (a) Flowchart description of the histone modification validation scheme used in this manuscript. The MS data was first searched using X!Tandem against the SGD whole protein database. The data was then filtered and the top hits were manually verified. (b) A typical false positive error rate for Peptide Prophet results from our MS data. The output from Peptide Prophet is used to create sensitivity and error curves from which a minimum Peptide Prophet probability can be selected to yield the desired error rate for filtering results. For this research, a minimum probability to produce an error of 5% was used as an initial cut-off. Peptide Prophet was used alongside other filtering methods to analyze data.

### H3 K9ac

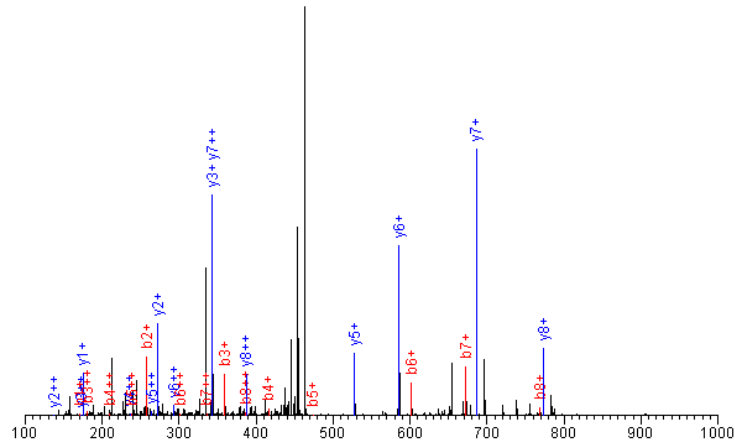

| $b^{2+}$ | $b^+$    | # | AA | # | $y^+$    | $y^{2+}$ |
|----------|----------|---|----|---|----------|----------|
| 86.1185  | 171.2290 | 1 | K  | 9 |          |          |
| 129.6576 | 258.3072 | 2 | S  | 8 | 773.8674 | 387.4377 |
| 180.2101 | 359.4123 | 3 | T  | 7 | 686.7892 | 343.8986 |
| 208.7361 | 416.4642 | 4 | G  | 6 | 585.6841 | 293.3460 |
| 237.2620 | 473.5161 | 5 | G  | 5 | 528.6322 | 264.8201 |
| 301.3491 | 601.6902 | 6 | K  | 4 | 471.5803 | 236.2941 |
| 336.8885 | 672.7690 | 7 | A  | 3 | 343.4062 | 172.2071 |
| 385.4468 | 769.8857 | 8 | P  | 2 | 272.3274 | 136.6677 |
|          |          | 9 | R  | 1 | 175.2107 | 88.1093  |

### H3 K18ac

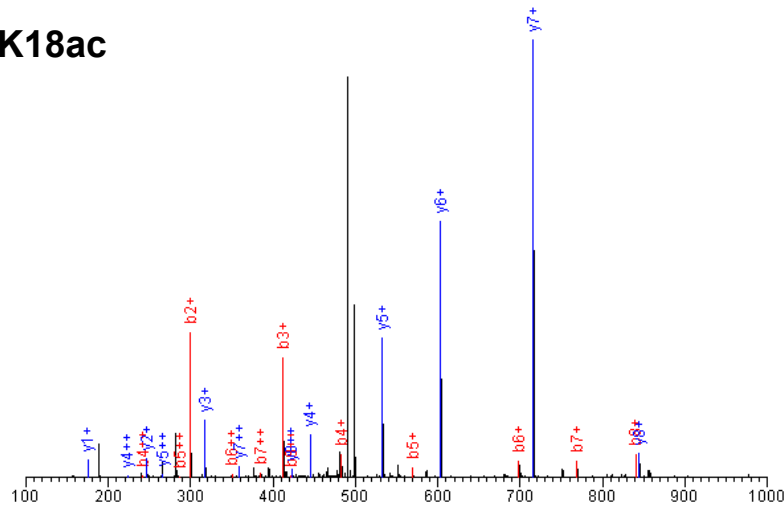

| $b^{2+}$ | $b^+$    | # | AA | # | $y^+$    | $y^{2+}$ |
|----------|----------|---|----|---|----------|----------|
| 86.1185  | 171.2290 | 1 | K  | 9 |          |          |
| 150.1838 | 299.3597 | 2 | Q  | 8 | 844.9895 | 422.9987 |
| 206.7636 | 412.5192 | 3 | L  | 7 | 716.8588 | 358.9334 |
| 242.3030 | 483.5980 | 4 | A  | 6 | 603.6994 | 302.3537 |
| 285.8421 | 570.6762 | 5 | S  | 5 | 532.6206 | 266.8143 |
| 349.9291 | 698.8503 | 6 | K  | 4 | 445.5424 | 223.2752 |
| 385.4685 | 769.9291 | 7 | A  | 3 | 317.3683 | 159.1881 |
| 421.0079 | 841.0079 | 8 | A  | 2 | 246.2895 | 123.6487 |
|          |          | 9 | R  | 1 | 175.2107 | 88.1093  |

### H4 mono-ac (K12)

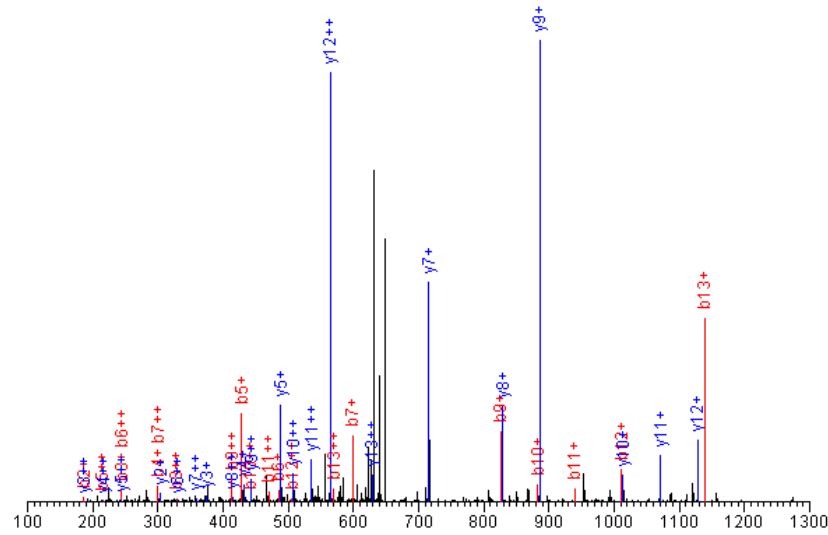

| b <sup>2+</sup> | b <sup>+</sup> | #  | AA | #  | y <sup>+</sup> | y <sup>2+</sup> |
|-----------------|----------------|----|----|----|----------------|-----------------|
| 29.5339         | 58.0599        | 1  | G  | 14 |                |                 |
| 93.6209         | 186.2339       | 2  | K  | 13 | 1256.5038      | 628.7559        |
| 122.1469        | 243.2859       | 3  | G  | 12 | 1128.3297      | 564.6688        |
| 150.6729        | 300.3378       | 4  | G  | 11 | 1071.2778      | 536.1429        |
| 214.7599        | 428.5119       | 5  | K  | 10 | 1014.2259      | 507.6169        |
| 243.2859        | 485.5638       | 6  | G  | 9  | 886.0518       | 443.5299        |
| 299.8656        | 598.7232       | 7  | L  | 8  | 828.9999       | 415.0039        |
| 328.3915        | 655.7751       | 8  | G  | 7  | 715.8404       | 358.4242        |
| 413.5021        | 825.9962       | 9  | K- | 6  | 658.7885       | 329.8982        |
| 442.0280        | 883.0481       | 10 | G  | 5  | 488.5674       | 244.7877        |
| 470.5540        | 940.1001       | 11 | G  | 4  | 431.5155       | 216.2617        |
| 506.0934        | 1011.1789      | 12 | A  | 3  | 374.4636       | 187.7358        |
| 570.1804        | 1139.3529      | 13 | K  | 2  | 303.3848       | 152.1964        |
|                 |                | 14 | R  | 1  | 175.2107       | 88.1093         |

### H4 di-ac (K12,16)

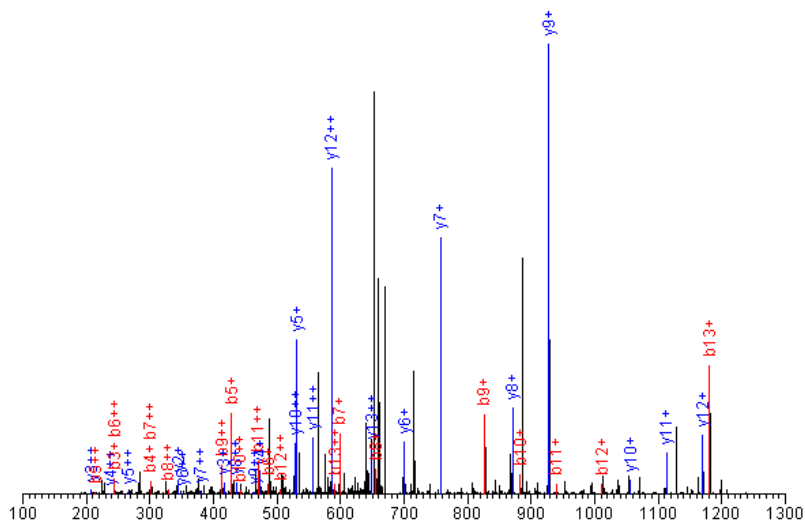

| b <sup>2+</sup> | b <sup>+</sup> | #  | AA | #  | y <sup>+</sup> | y <sup>2+</sup> |
|-----------------|----------------|----|----|----|----------------|-----------------|
| 29.5339         | 58.0599        | 1  | G  | 14 |                |                 |
| 93.6209         | 186.2339       | 2  | K  | 13 | 1298.5508      | 649.7794        |
| 122.1469        | 243.2859       | 3  | G  | 12 | 1170.3767      | 585.6923        |
| 150.6729        | 300.3378       | 4  | G  | 11 | 1113.3248      | 557.1664        |
| 214.7599        | 428.5119       | 5  | K  | 10 | 1056.2729      | 528.6404        |
| 243.2859        | 485.5638       | 6  | G  | 9  | 928.0988       | 464.5534        |
| 299.8656        | 598.7232       | 7  | L  | 8  | 871.0469       | 436.0274        |
| 328.3915        | 655.7751       | 8  | G  | 7  | 757.8874       | 379.4477        |
| 413.5021        | 825.9962       | 9  | K- | 6  | 700.8355       | 350.9217        |
| 442.0280        | 883.0481       | 10 | G  | 5  | 530.6144       | 265.8112        |
| 470.5540        | 940.1001       | 11 | G  | 4  | 473.5625       | 237.2852        |
| 506.0934        | 1011.1789      | 12 | A  | 3  | 416.5106       | 208.7593        |
| 591.2039        | 1181.3999      | 13 | K- | 2  | 345.4318       | 173.2199        |
|                 |                | 14 | R  | 1  | 175.2107       | 88.1093         |

Supplementary Figure 3

### H4 tri-ac (K5,8,12)

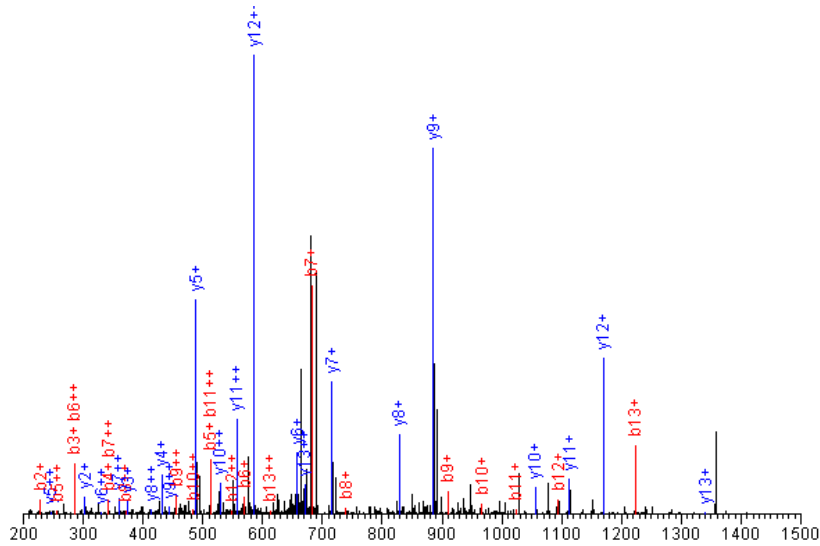

| $b^{2+}$ | $b^+$     | #  | AA | #  | $y^+$     | $y^{2+}$ |
|----------|-----------|----|----|----|-----------|----------|
| 29.5339  | 58.0599   | 1  | G  | 14 |           |          |
| 114.6444 | 228.2809  | 2  | K- | 13 | 1340.5978 | 670.8029 |
| 143.1704 | 285.3329  | 3  | G  | 12 | 1170.3767 | 585.6923 |
| 171.6964 | 342.3848  | 4  | G  | 11 | 1113.3248 | 557.1664 |
| 256.8069 | 512.6059  | 5  | K- | 10 | 1056.2729 | 528.6404 |
| 285.3329 | 569.6578  | 6  | G  | 9  | 886.0518  | 443.5299 |
| 341.9126 | 682.8172  | 7  | L  | 8  | 828.9999  | 415.0039 |
| 370.4385 | 739.8691  | 8  | G  | 7  | 715.8404  | 358.4242 |
| 455.5491 | 910.0902  | 9  | K- | 6  | 658.7885  | 329.8982 |
| 484.0750 | 967.1421  | 10 | G  | 5  | 488.5674  | 244.7877 |
| 512.6010 | 1024.1941 | 11 | G  | 4  | 431.5155  | 216.2617 |
| 548.1404 | 1095.2729 | 12 | A  | 3  | 374.4636  | 187.7358 |
| 612.2274 | 1223.4469 | 13 | K  | 2  | 303.3848  | 152.1964 |
|          |           | 14 | R  | 1  | 175.2107  | 88.1093  |

### H4 tetra-ac (K5,8,12,16)

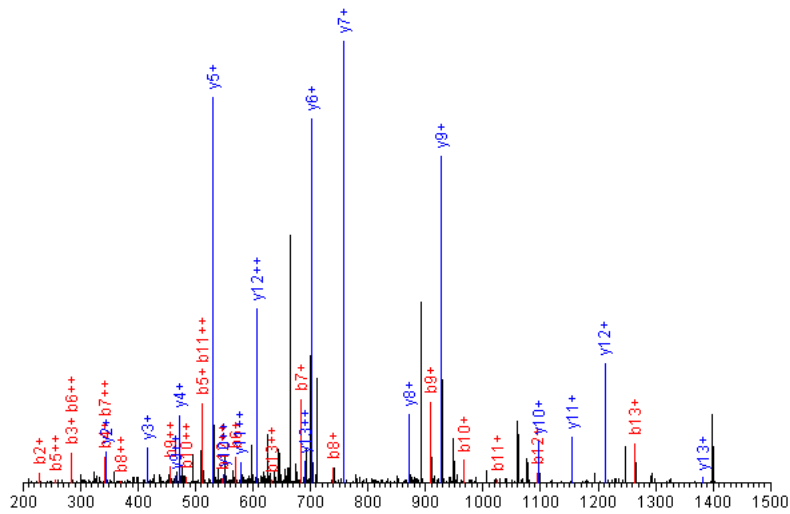

| $b^{2+}$ | $b^+$     | #  | AA | #  | $y^+$     | $y^{2+}$ |
|----------|-----------|----|----|----|-----------|----------|
| 29.5339  | 58.0599   | 1  | G  | 14 |           |          |
| 114.6444 | 228.2809  | 2  | K- | 13 | 1382.6448 | 691.8264 |
| 143.1704 | 285.3329  | 3  | G  | 12 | 1212.4237 | 606.7158 |
| 171.6964 | 342.3848  | 4  | G  | 11 | 1155.3718 | 578.1899 |
| 256.8069 | 512.6059  | 5  | K- | 10 | 1098.3199 | 549.6639 |
| 285.3329 | 569.6578  | 6  | G  | 9  | 928.0988  | 464.5534 |
| 341.9126 | 682.8172  | 7  | L  | 8  | 871.0469  | 436.0274 |
| 370.4385 | 739.8691  | 8  | G  | 7  | 757.8874  | 379.4477 |
| 455.5491 | 910.0902  | 9  | K- | 6  | 700.8355  | 350.9217 |
| 484.0750 | 967.1421  | 10 | G  | 5  | 530.6144  | 265.8112 |
| 512.6010 | 1024.1941 | 11 | G  | 4  | 473.5625  | 237.2852 |
| 548.1404 | 1095.2729 | 12 | A  | 3  | 416.5106  | 208.7593 |
| 633.2509 | 1265.4939 | 13 | K- | 2  | 345.4318  | 173.2199 |
|          |           | 14 | R  | 1  | 175.2107  | 88.1093  |

Supplementary Figure 3

# H3 K9,14ac

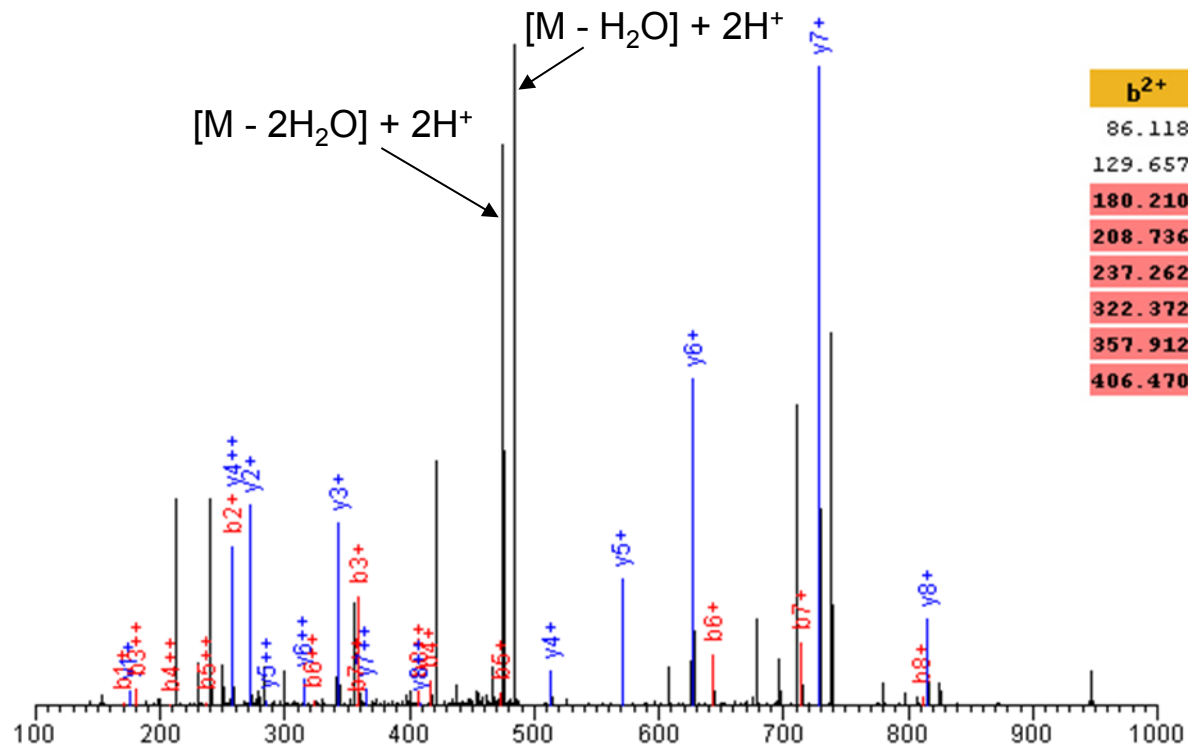

| $b^{2+}$ | $b^+$    | # | AA | # | $y^+$    | $y^{2+}$ |
|----------|----------|---|----|---|----------|----------|
| 86.1185  | 171.2290 | 1 | K~ | 9 |          |          |
| 129.6576 | 258.3072 | 2 | S  | 8 | 815.9144 | 408.4612 |
| 180.2101 | 359.4123 | 3 | T  | 7 | 728.8362 | 364.9221 |
| 208.7361 | 416.4642 | 4 | G  | 6 | 627.7311 | 314.3695 |
| 237.2620 | 473.5161 | 5 | G  | 5 | 570.6792 | 285.8436 |
| 322.3726 | 643.7372 | 6 | K~ | 4 | 513.6273 | 257.3176 |
| 357.9120 | 714.8160 | 7 | R  | 3 | 343.4062 | 172.2071 |
| 406.4703 | 811.9327 | 8 | P  | 2 | 272.3274 | 136.6677 |
|          |          | 9 | R  | 1 | 175.2107 | 88.1093  |

Supplementary Figure 3





## H2B K123ub1

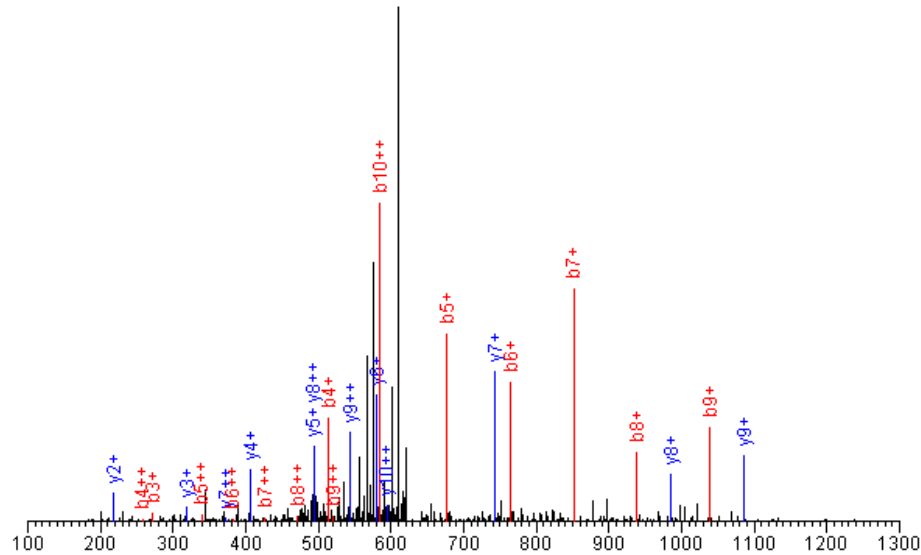

| $b^{2+}$ | $b^+$     | #  | AA | #  | $y^+$     | $y^{2+}$ |
|----------|-----------|----|----|----|-----------|----------|
| 36.5473  | 72.0867   | 1  | A  | 11 |           |          |
| 86.1136  | 171.2193  | 2  | V  | 10 | 1186.2030 | 593.6055 |
| 136.6662 | 272.3244  | 3  | T  | 9  | 1087.0704 | 544.0392 |
| 257.7747 | 514.5414  | 4  | K# | 8  | 985.9654  | 493.4867 |
| 339.3626 | 677.7173  | 5  | Y  | 7  | 743.7484  | 372.3782 |
| 382.9017 | 764.7955  | 6  | S  | 6  | 580.5724  | 290.7902 |
| 426.4408 | 851.8737  | 7  | S  | 5  | 493.4942  | 247.2511 |
| 469.9799 | 938.9519  | 8  | S  | 4  | 406.4160  | 203.7120 |
| 520.5325 | 1040.0570 | 9  | T  | 3  | 319.3378  | 160.1729 |
| 584.5978 | 1168.1877 | 10 | Q  | 2  | 218.2327  | 109.6203 |
|          |           | 11 | A  | 1  | 90.1020   | 45.5550  |

### Supplementary Figure 3. The quality of MS data after filtering is very high.

Representative fragmentation spectra from MS of several modified histone peptides relevant to this manuscript, detected after filtering the mass spectrometry data and being manually verified. Predicted m/z values for b- and y-ions are indicated in the box on the right, and every b- and y-ion that was detected in the actual data is color-coded (red for b-ions and blue for y-ions). Almost all of the detectable ions were detected. Those not detected were typically in very low m/z ranges. The MS spectra for other histone peptides are available upon request.

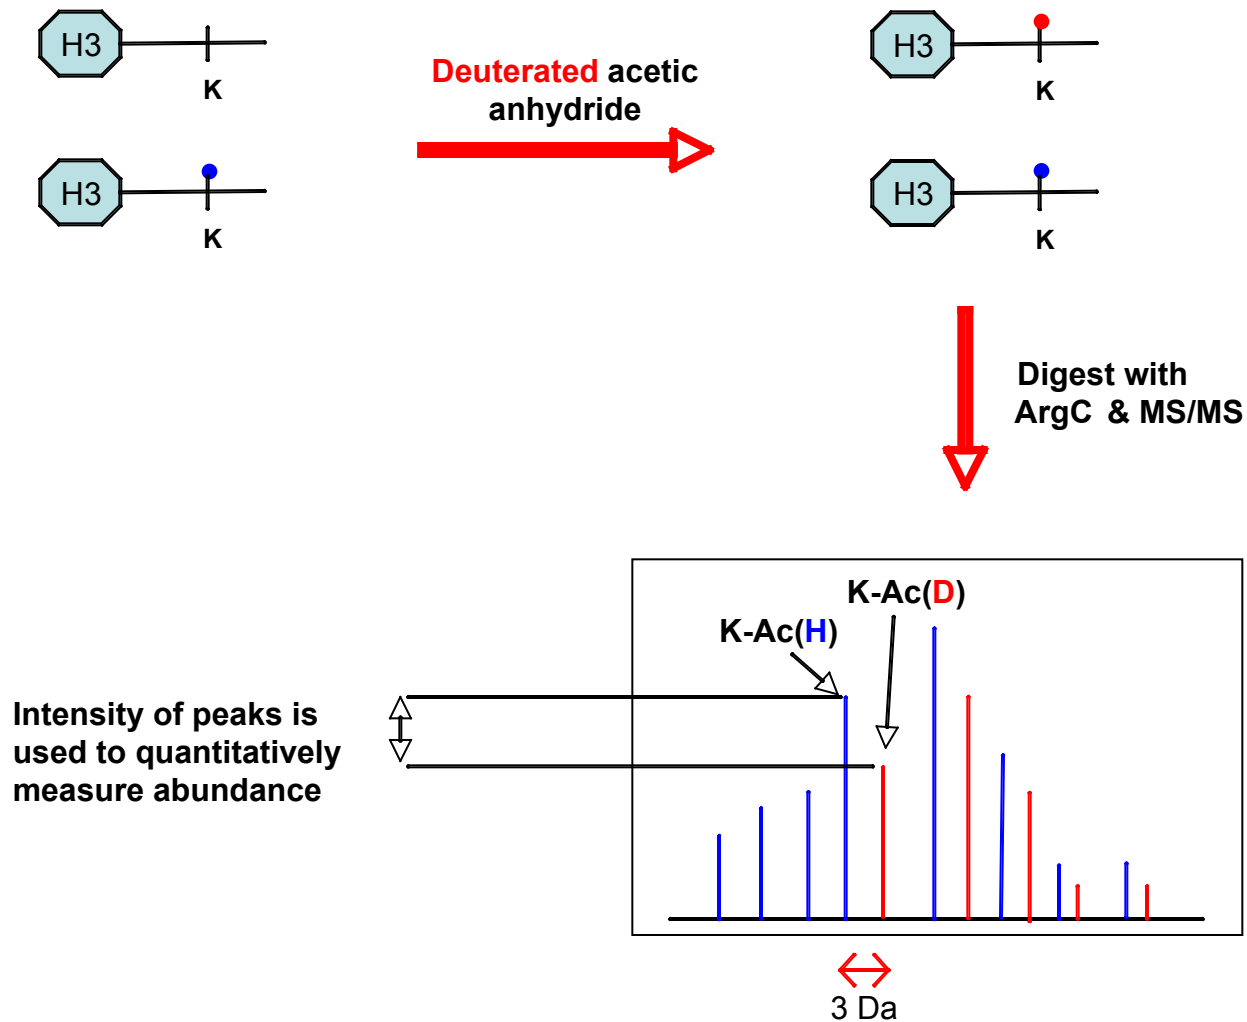

**Supplementary Figure 4. A description of the scheme for quantitating acetylations by MS.**

A schematic description of the histone acetylation quantitation method is shown for a hypothetical histone H3 protein containing a single lysine. When the histones are treated with deuterated acetic anhydride, unacetylated lysines are converted to deuterated acetyllysines (represented with a red dot). Histones where the lysine had been acetylated in vivo remain unchanged as protiated acetyllysines (depicted with a blue dot). The proteins are then digested and analyzed on a mass spectrometer as before. Fragments containing a deuterated acetyllysine are chemically identical to those with a protiated acetyllysine, except that they are mass shifted by 3 Da. The intensity difference in the peak heights is then used as a quantitative measure of abundance of each form.

**a**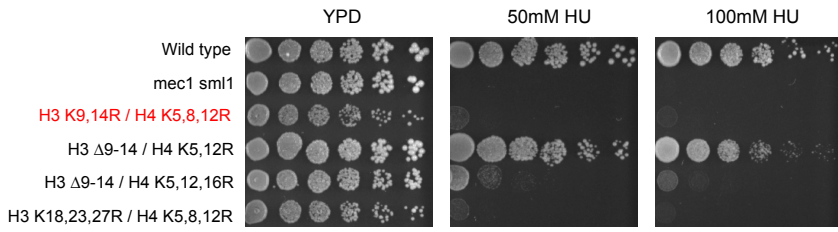

| H3            | H4           | growth  | HU   | MMS  |
|---------------|--------------|---------|------|------|
| wild type     | wild type    | ++++    | ++++ | ++++ |
| H3 K9,14R     | H4 K5,8,12R  | +++ /TS | +    | +    |
| H3 K9,14R     | wild type    | ++++    | ++++ | ++++ |
| H3 K14,23R    | wild type    | ++++    | ++++ | ++++ |
| H3 K14,23,27R | wild type    | ++++    | ++++ | ++++ |
| H3 K18,23,27R | wild type    | ++++    | ++++ | ++++ |
| H3 K9,18,27R  | wild type    | ++++    | ++++ | ++++ |
| H3 del9-14    | wild type    | ++++    | ++++ | ++++ |
| wild type     | H4 K5,12R    | ++++    | ++++ | ++++ |
| wild type     | H4 K5,8,12R  | ++++    | ++++ | ++++ |
| wild type     | H4 K5,12,16R | ++++    | ++++ | ++++ |
| H3 del9-14    | H4 K5,8,12R  | ++ /TS  | +    | +    |
| H3 del9-14    | H4 K5,12R    | ++++    | ++++ | ++++ |
| H3 del9-14    | H4 K5,12,16R | +++ /TS | ++   | ++   |
| H3 K18,23,27R | H4 K5,8,12R  | +++ /TS | +    | +    |
| mec1          |              | sml1    | ++++ | +    |
|               |              |         | +    | +    |

**b**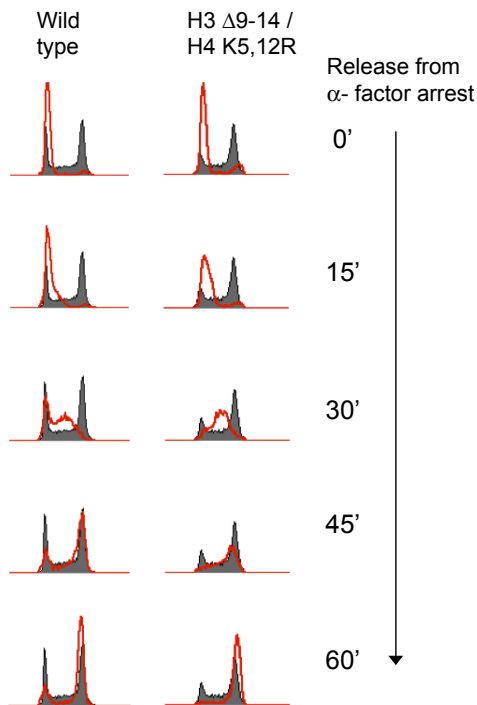**c**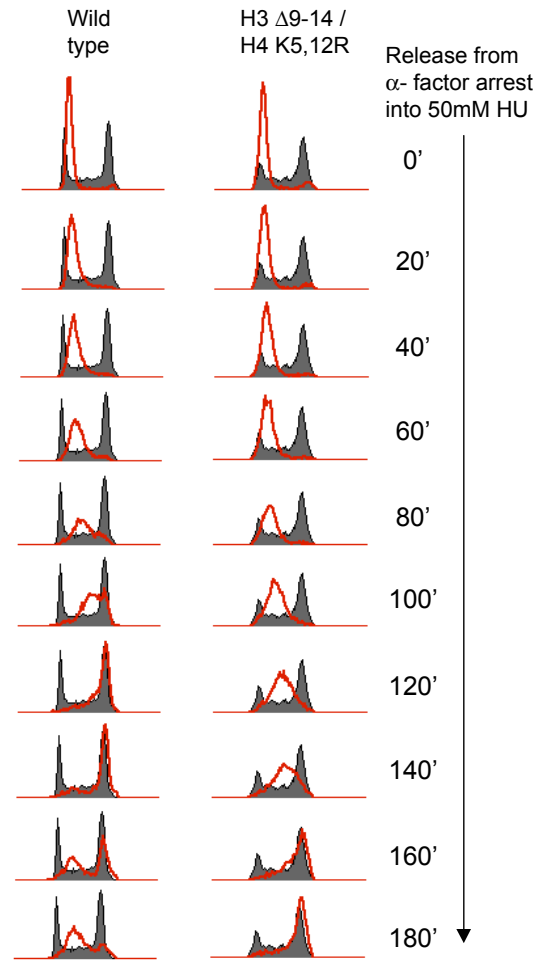

**Supplementary Figure 5. Multiple acetylations of H3 and H4 tails are required for efficient DNA replication.**

(a) Spot test of histone mutants. Five-fold serial dilution of cells were spotted onto rich media (YPD) with or without HU. A summary of the growth assays is shown as a table on the right. (b) FACS analysis of H3 $\Delta$ 9-14/H4 K5,12R mutant. Cells were arrested in G1, then released into YPD. Red lines show the kinetics of FACS profile, and the grey patterns denote the FACS profiles of log phase cells. (c) FACS analysis of H3 $\Delta$ 9-14/H4 K5,12R mutant in 50 mM HU. Cells were arrested in G1, then released into YPD containing 50 mM HU.

| <b>Protein</b> | <b>Sequence Mass</b> | <b>Peptides</b> | <b>Unique Peptides</b> | <b>AA Coverage</b> |
|----------------|----------------------|-----------------|------------------------|--------------------|
| HTB1           | 14,252               | 28              | 17                     | 93.9%              |
| HHT1           | 15,356               | 62              | 42                     | 86.2%              |
| HTA2           | 13,989               | 19              | 12                     | 84.8%              |
| HHF1           | 11,368               | 42              | 27                     | 83.7%              |
| HTB2           | 14,237               | 24              | 11                     | 61.1%              |
| Lacl           | 38,590               | 41              | 31                     | 57.2%              |
| HTZ1           | 14,283               | 7               | 5                      | 54.5%              |
| MCM3           | 107,518              | 60              | 39                     | 45.5%              |
| MCM5           | 86,411               | 35              | 28                     | 40.9%              |
| SSA2           | 69,470               | 19              | 16                     | 39.6%              |
| NHP6B          | 11,575               | 4               | 4                      | 38.4%              |
| MCM4           | 105,003              | 44              | 28                     | 35.8%              |
| RIM1           | 15,386               | 5               | 4                      | 34.8%              |
| SSB2           | 66,595               | 19              | 15                     | 34.7%              |
| NHP6A          | 10,802               | 2               | 2                      | 28.0%              |
| TIF2           | 44,697               | 6               | 6                      | 26.8%              |
| SPT15          | 27,003               | 3               | 3                      | 26.7%              |
| POB3           | 62,994               | 12              | 11                     | 26.6%              |
| SAR1           | 21,451               | 2               | 2                      | 25.8%              |
| MCM6           | 112,978              | 21              | 18                     | 25.2%              |
| ASC1           | 34,805               | 4               | 4                      | 24.5%              |
| RPB3           | 35,298               | 6               | 4                      | 23.3%              |
| YRA1           | 24,956               | 4               | 4                      | 22.6%              |
| ISW1           | 131,102              | 23              | 19                     | 22.2%              |
| RVB2           | 51,611               | 5               | 5                      | 22.1%              |
| RPB8           | 16,511               | 3               | 2                      | 21.9%              |
| DED1           | 65,553               | 8               | 8                      | 21.9%              |
| RPO26          | 17,910               | 3               | 2                      | 21.3%              |
| DIG1           | 49,356               | 6               | 6                      | 21.2%              |
| MCM7           | 94,875               | 15              | 12                     | 21.2%              |
| TEF2           | 50,033               | 9               | 8                      | 21.0%              |
| NOP58          | 56,956               | 6               | 6                      | 20.2%              |
| YKT6           | 22,707               | 3               | 3                      | 20.0%              |
| RPB10          | 8,278                | 2               | 2                      | 20.0%              |
| CDC19          | 54,545               | 8               | 7                      | 19.8%              |
| SEC65          | 31,170               | 3               | 3                      | 19.8%              |
| RPB2           | 138,751              | 19              | 19                     | 19.7%              |
| SUI3           | 31,574               | 3               | 3                      | 19.6%              |
| VMA2           | 57,749               | 7               | 7                      | 19.3%              |
| SRP54          | 59,624               | 7               | 7                      | 18.7%              |
| PDC1           | 61,495               | 9               | 8                      | 18.5%              |

|         |         |    |    |       |
|---------|---------|----|----|-------|
| TSA1    | 21,590  | 2  | 2  | 18.4% |
| HSP12   | 11,693  | 2  | 2  | 18.3% |
| SSC1    | 70,628  | 13 | 11 | 18.2% |
| SPT16   | 118,630 | 17 | 12 | 17.7% |
| PGK1    | 44,738  | 8  | 6  | 17.5% |
| TDH3    | 35,747  | 4  | 4  | 17.5% |
| GPM1    | 27,609  | 4  | 3  | 17.4% |
| HSP82   | 81,406  | 8  | 8  | 16.9% |
| YHR121W | 21,314  | 3  | 2  | 16.6% |
| CBF5    | 54,705  | 4  | 4  | 16.6% |
| GAL4    | 99,403  | 15 | 13 | 16.3% |
| YOP1    | 20,269  | 2  | 2  | 16.1% |
| ENO2    | 46,914  | 6  | 5  | 16.0% |
| SIK1    | 56,864  | 6  | 6  | 15.9% |
| RVB1    | 50,453  | 5  | 4  | 15.8% |
| ADK1    | 24,255  | 2  | 2  | 15.3% |
| RPO21   | 191,612 | 26 | 21 | 15.2% |
| SIS1    | 37,590  | 3  | 3  | 15.1% |
| YTA7    | 157,407 | 24 | 21 | 14.9% |
| SUM1    | 118,201 | 7  | 7  | 14.8% |
| GAL80   | 48,323  | 3  | 3  | 13.8% |
| IOC4    | 55,427  | 6  | 5  | 13.7% |
| OYE2    | 45,011  | 2  | 2  | 13.0% |
| SSA4    | 69,651  | 5  | 5  | 12.8% |
| SPT5    | 115,650 | 9  | 9  | 12.5% |
| PRE5    | 25,604  | 2  | 2  | 11.5% |
| ARO4    | 39,749  | 2  | 2  | 11.4% |
| IOC2    | 93,445  | 9  | 7  | 11.1% |
| TOP2    | 164,215 | 10 | 9  | 9.8%  |
| RPB4    | 25,414  | 2  | 2  | 9.5%  |
| RPB5    | 25,079  | 2  | 2  | 9.3%  |
| GFA1    | 80,047  | 4  | 4  | 9.2%  |
| IOC3    | 90,897  | 4  | 3  | 9.1%  |
| SMC6    | 128,009 | 6  | 6  | 9.1%  |
| SAM1    | 41,818  | 2  | 2  | 8.9%  |
| ORC4    | 60,705  | 4  | 3  | 8.9%  |
| RFA1    | 70,348  | 4  | 4  | 8.5%  |
| TOP2    | 164,215 | 10 | 9  | 9.8%  |

### **Supplementary Table 1**

A table of some of the proteins identified by mass spectrometry from TALO8 eluates prepared from asynchronously growing mid log-phase cells. The proteins are arranged in descending order of amino acid coverage, as determined from filtered mass spectrometry data. The data was first filtered in CPAS using ProteinProphet such that the false positive discovery rate was less than 0.05 and the top 80 hits were selected. As a result, all the peptide shown in this table have the false discovery rate of less than 0.002.



| <b>Protein</b> | <b>Sequence Mass</b> | <b>Peptides</b> | <b>Unique Peptides</b> | <b>AA Coverage</b> |
|----------------|----------------------|-----------------|------------------------|--------------------|
| MCM3           | 107,518              | 60              | 39                     | 45.5%              |
| MCM5           | 86,411               | 35              | 28                     | 40.9%              |
| MCM4           | 105,003              | 44              | 28                     | 35.8%              |
| MCM6           | 112,978              | 21              | 18                     | 25.2%              |
| MCM7           | 94,875               | 15              | 12                     | 21.2%              |
| ORC4           | 60,705               | 4               | 3                      | 8.9%               |
| ORC1           | 104,400              | 4               | 4                      | 6.1%               |
| ORC6           | 50,296               | 1               | 1                      | 6.0%               |
| ORC3           | 72,077               | 3               | 2                      | 5.7%               |
| ORC5           | 55,289               | 1               | 1                      | 2.9%               |
| SLD2           | 52,272               | 1               | 1                      | 2.6%               |
| SLD3           | 77,298               | 1               | 1                      | 1.5%               |
| RFA3           | 13,816               | 1               | 1                      | 12.3%              |
| POB3           | 62,994               | 12              | 11                     | 26.6%              |
| SPT16          | 118,630              | 17              | 12                     | 17.7%              |

### **Supplementary Table 2**

A table of some replication-associated factors identified in TALO8 eluates from S-phase. The data was filtered as in Supplementary Table 1.

| <b>Name</b> | <b>Genetic Background</b>                                                                         | <b>Notes</b>                                       |
|-------------|---------------------------------------------------------------------------------------------------|----------------------------------------------------|
| W1588-4c    | <i>MATa ade2-1 can1-100 his3-11,15 leu2-3,112 trp1-1 ura3-1 RAD5+</i>                             | RAD5+ version of W303-1 (Thomas & Rothstein, 1989) |
| YTT 2606    | <i>MATa ura3-1::pRS406-CMV-LacI-3FLAG-URA3</i>                                                    | All YTT strains are derived from W1588-4C          |
| YTT 3675    | <i>MATa ura3-1::pRS406-CMV-LacI-3FLAG-URA3 TALO8</i>                                              |                                                    |
| YTT 2455    | <i>MATa hht1-hhf1::HphMX hht2-hhf2::NatMX (pRM200U-HHT2-HHF2)</i>                                 |                                                    |
| YTT 3515    | <i>MATa hht1-hhf1::HphMX hht2-hhf2::NatMX trp1-1::pRS404-HHT2-HHF2</i>                            |                                                    |
| YTT 3690    | <i>MATa hht1-hhf1::HphMX hht2-hhf2::NatMX trp1-1::pRS404- HHT2 – hhf2K5,8,12R</i>                 |                                                    |
| YTT 3716    | <i>MATa hht1-hhf1::HphMX hht2-hhf2::NatMX trp1-1::pRS404- hht2K9,14R -HHF2</i>                    |                                                    |
| YTT 3846    | <i>MATa hht1-hhf1::HphMX hht2-hhf2::NatMX trp1-1::pRS404- hht2K9,14R-hhf2K5,8,12R</i>             |                                                    |
| YTT 4240    | <i>MATa hht1-hhf1::HphMX hht2-hhf2::NatMX trp1-1::pRS404-HHT2-HHF2 bar1::LEU2</i>                 |                                                    |
| YTT 4238    | <i>MATa hht1-hhf1::HphMX hht2-hhf2::NatMX trp1-1:: pRS404- hht2K9,14R-hhf2K5,8,12R bar1::LEU2</i> |                                                    |
| YTT 3722    | <i>MATa hht1-hhf1::HphMX hht2-hhf2::NatMX trp1-1:: pRS404- hht2K14,23R-HHF2</i>                   |                                                    |
| YTT 3718    | <i>MATa hht1-hhf1::HphMX hht2-hhf2::NatMX trp1-1:: pRS404- hht2K14,23,27R-HHF2</i>                |                                                    |

|          |                                                                                           |  |
|----------|-------------------------------------------------------------------------------------------|--|
| YTT 3773 | <i>MATa hht1-hhf1::HphMX hht2-hhf2::NatMX trp1-1:: pRS404-hht2K9,18,27R-HHF2</i>          |  |
| YTT 3720 | <i>MATa hht1-hhf1::HphMX hht2-hhf2::NatMX trp1-1:: pRS404- hht2Δ9-14-HHF2</i>             |  |
| YTT 2237 | <i>MATa hht1-hhf1::HphMX hht2-hhf2::NatMX (pMP101- HHT2-hhf2K5,12R)</i>                   |  |
| YTT 3688 | <i>MATa hht1-hhf1::HphMX hht2-hhf2::NatMX trp1-1:: pRS404- HHT2-hhf2K5,12,16R</i>         |  |
| YTT 3725 | <i>MATa hht1-hhf1::HphMX hht2-hhf2::NatMX trp1-1:: pRS404- hht2Δ9-14-hhf2K5,8,12R</i>     |  |
| YTT 3898 | <i>MATa hht1-hhf1::HphMX hht2-hhf2::NatMX trp1-1:: pRS404- hht2Δ9-14-hhf2K5,12R</i>       |  |
| YTT 3900 | <i>MATa hht1-hhf1::HphMX hht2-hhf2::NatMX trp1-1:: pRS404- hht2Δ9-14-hhf2K5,12,16R</i>    |  |
| YTT 3848 | <i>MATa hht1-hhf1::HphMX hht2-hhf2::NatMX trp1-1:: pRS404-hht2K18,23,27R-hhf2K5,8,12R</i> |  |

### Supplementary Table 3

A table of all the yeast strains used in this study.

## Supplementary Methods

In order to achieve necessary improvement in mini-chromosome purification and histone MS analyses, we modified the purification and MS protocols as the following:

1. Systems utilizing lac repressor (LacI) - lac operator (LacO), tet repressor - tet operator or LexA - LexA binding site were tested in parallel for minichromosome purification and the LacI – LacO system was chosen for the best yield and purity (data not shown).
2. The LacO sequence was placed in a wide nucleosome-free region upstream of *TRP1*<sup>29</sup> to facilitate binding of LacI to the minichromosome template (Fig 1a).
3. Minichromosomes containing one (1x), three (3x) or eight (8x) tandem copies of LacO were tested and minichromosomes with 8xLacO (henceforth referred to as TALO8) were chosen based on high yield and purity.
4. Since free LacI is highly susceptible to protease degradation *in vitro*, triple FLAG-epitope tagged LacI was expressed in yeast cells containing TALO8 such that the LacI – LacO interaction takes place *in vivo*.
5. Anti-FLAG M2 agarose beads (Sigma) and protein-G magnetic beads cross-linked with anti-FLAG M2 antibodies were tested in parallel to affinity purify

- TALO8, and the latter was found to significantly reduce background of contaminating genomic DNA and non-histone proteins.
6. The optimal concentration of potassium chloride (KCl) in the wash solutions was systematically tested and it was determined that 300mM KCl yielded the cleanest sample without significant loss of minichromosome.
  7. The relative abundance of LacI to TALO8 was crucial for the purity of the sample, since excess LacI brings down non-specifically bound genomic chromatin and associated proteins. LacI expressed off single and high-copy vectors were tested and it was determined that a single-copy vector, integrated into the genome, yielded the cleanest sample.
  8. Elutions using Rapigest (Waters), a MS-compatible anionic surfactant, rather than competitive elution with FLAG-peptides, were found to significantly decrease the amounts of LacI that were eluted, while still resulting in complete elution of all histone proteins (Fig 1c). This eliminated the need for further purification of histones away from LacI, excess amounts of which interferes with subsequent MS analysis.
  9. To detect the highly hydrophilic peptides corresponding to the histone H3 amino terminal without any additional chromatographic separations, solution-digested peptides from the elutions were directly fed from an in-line chromatographic column into the mass spectrometer.
